# Supplementary material for: Vitamin D Inhibits IL-22 Production Through a Repressive Vitamin D Response Element in the il22 Promoter
Source: PubMed Central journal article supplement (PMC8366496; doi:10.3389/fimmu.2021.715059), 2021-08-02
Supplement: Image_1.pdf [file Image_1.pdf]

A

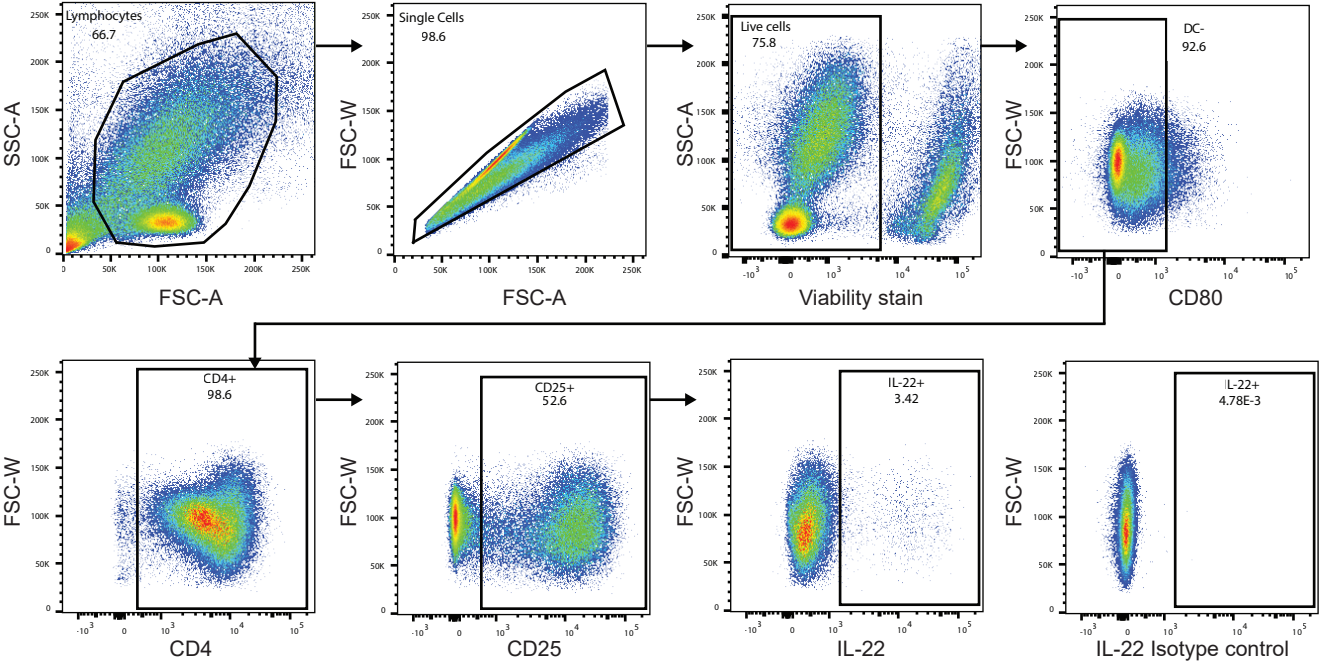

B

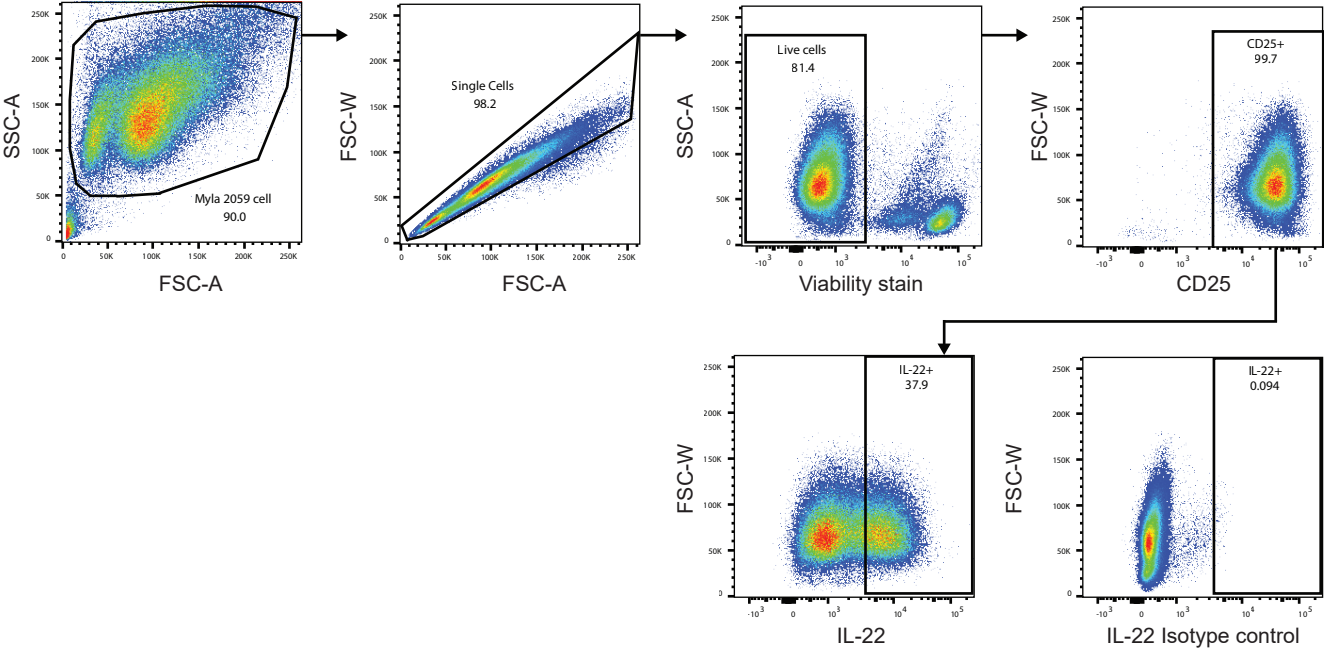

**SUPPLEMENTARY FIGURE 1.** Gating strategy used to determine the frequency of (A) IL-22<sup>+</sup> CD25<sup>+</sup> Th22 cells and (B) IL-22<sup>+</sup> CD25<sup>+</sup> Myla 2059 cells.
