# Supplementary material for: Vitamin D Inhibits IL-22 Production Through a Repressive Vitamin D Response Element in the il22 Promoter
Source: PubMed Central journal article supplement (PMC8366496; doi:10.3389/fimmu.2021.715059), 2021-08-02
Supplement: Image_2.pdf [file Image_2.pdf]

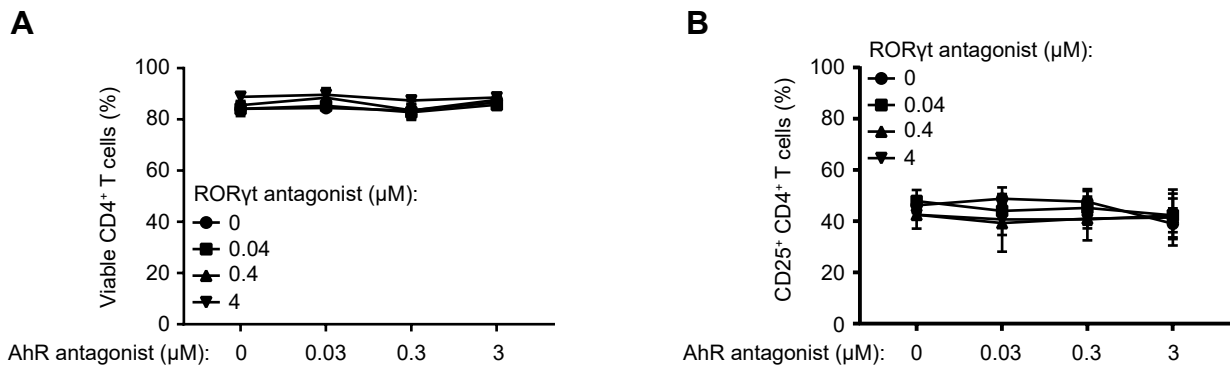

**SUPPLEMENTARY FIGURE 2. (A)** Cell viability and **(B)** expression of the activation marker CD25 on CD4<sup>+</sup> T cells stimulated in Th22 medium for 96 h with the indicated concentrations of the AhR antagonist CH-223191 and the RORγt antagonist SR-2211. Data were obtained from one experiment with two donors.
