# Supplementary material for: Vitamin D Inhibits IL-22 Production Through a Repressive Vitamin D Response Element in the il22 Promoter
Source: PubMed Central journal article supplement (PMC8366496; doi:10.3389/fimmu.2021.715059), 2021-08-02
Supplement: Image_4.pdf [file Image_4.pdf]

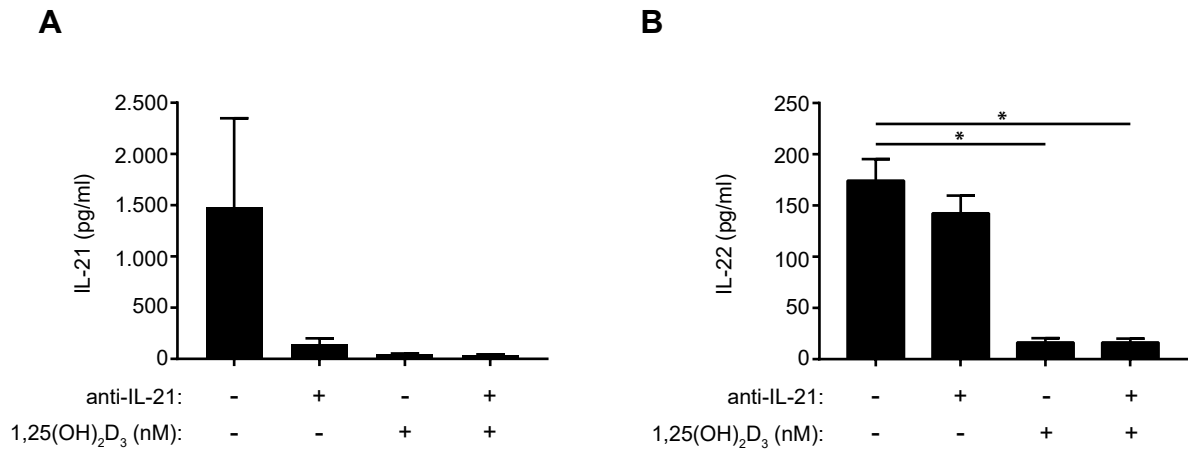

**SUPPLEMENTARY FIGURE 4. (A) IL-21 and (B) IL-22 concentrations in the supernatant of T cells stimulated with Dynabeads Human T activator CD3/CD28 in X-VIVO 15 medium for 96 h in the absence or presence of 4  $\mu\text{g/ml}$  neutralizing anti-IL-21 antibodies and 10 nM 1,25(OH)<sub>2</sub>D<sub>3</sub>. Data were obtained from one experiment with three donors.**
