# Supplementary material for: Vitamin D Inhibits IL-22 Production Through a Repressive Vitamin D Response Element in the il22 Promoter
Source: PubMed Central journal article supplement (PMC8366496; doi:10.3389/fimmu.2021.715059), 2021-08-02
Supplement: Image_5.pdf [file Image_5.pdf]

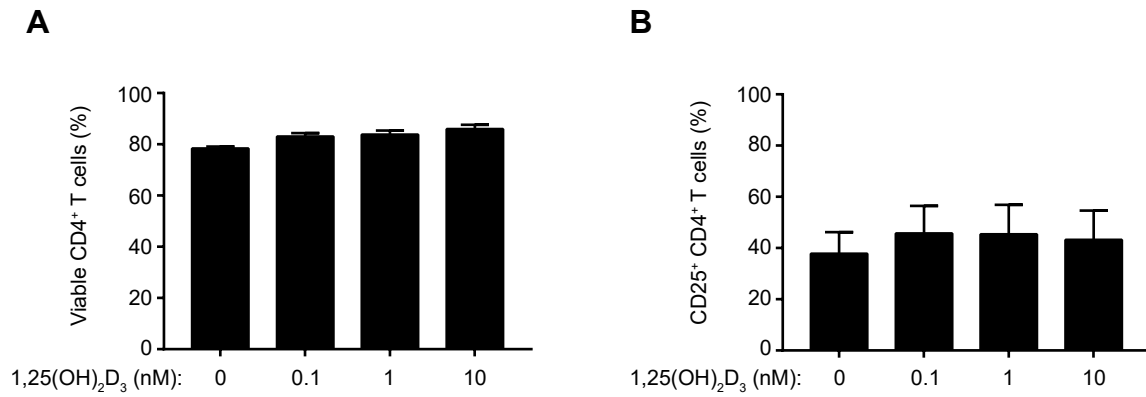

**SUPPLEMENTARY FIGURE 5.** (A) Cell viability and (B) expression of the activation marker CD25 on CD4<sup>+</sup> T cells stimulated with allogeneic DC in Th22 medium for 96 h in the presence of the indicated concentrations of 1,25(OH)<sub>2</sub>D<sub>3</sub>. Data were obtained from three independent experiments with five donors.
